# Supplementary material
Source: HighWire-hosted journal article supplement (https://cmaj.ca/highwire/filestream/59993/field_highwire_adjunct_files/0/170259-case-1-at.pdf)
Supplement: 170259-case-1-at.pdf [file 170259-case-1-at.pdf]

**Appendix 1:** Diabetes and Education Resource for Children and Adolescents, Health Sciences Centre, Winnipeg, Manitoba, clinical and demographic features of children diagnosed with type 2 diabetes at younger than 10 years, between 2012 and 2016

| <b>Clinical characteristic</b>      | <b>Total n = 32</b>                                            |
|-------------------------------------|----------------------------------------------------------------|
| Gender, male                        | 9                                                              |
| Mean BMI                            | 28.66 ht/m <sup>2</sup><br>SD = 5.12<br>(Range 18.93–42.9)     |
| Mean BMI z score                    | 2.366<br>SD = 0.67<br>(Range 0.74–4.7)                         |
| Rural                               | 29                                                             |
| First Nations status                | 32                                                             |
| Pregestational diabetes exposure    | 18                                                             |
| Gestational diabetes exposure       | 7                                                              |
| No gestational exposure             | 7                                                              |
| Mean HbA <sub>1c</sub> at diagnosis | 8.86%<br>SD = 2.01<br>(Range 6.0%–13.6%)                       |
| DKA at diagnosis                    | 1                                                              |
| Treatment at diagnosis              | Lifestyle = 20<br>Pre-mix insulin = 11<br>Insulin glargine = 1 |

Note: BMI = body mass index, DKA = diabetic ketoacidosis, HbA<sub>1c</sub> = glycated hemoglobin, SD = standard deviation.
